# Supplementary material for: Caenorhabditis elegans PIEZO channel coordinates multiple reproductive tissues to govern ovulation
Source: eLife. 2020 Jun 3;9:e53603. doi: 10.7554/eLife.53603 (PMC7340503; doi:10.7554/eLife.53603)
Supplement: Figure 1—source data 1. [file elife-53603-fig1-data1.xlsx]

## Sheet: Sheet1
Figure 1: pezo-1 expression pattern in C. elegans
Figure Panle	Strain (Genotype)	Number of Replicates Collected in This Study
Panel B	AG408 (pezo-1(av146 [gfp::pezo-1]) IV)	n>5
Panel C, E	AG408 (pezo-1(av146 [gfp::pezo-1]) IV)	n>10
Panel D	AG483 (pezo-1(av182 [pezo-1::mScarlet]) IV)	n>10
Panel G, I	AG483 (pezo-1(av182 [pezo-1::mScarlet]) IV)	n>5
Panel H, J	AG408 (pezo-1(av146 [gfp::pezo-1]) IV)	n>5
Panel K-O	AG408 (pezo-1(av146 [gfp::pezo-1]) IV)	n=3
