# Supplementary material for: Caenorhabditis elegans PIEZO channel coordinates multiple reproductive tissues to govern ovulation
Source: eLife. 2020 Jun 3;9:e53603. doi: 10.7554/eLife.53603 (PMC7340503; doi:10.7554/eLife.53603)
Supplement: Figure 2—figure supplement 1—source data 1. [file elife-53603-fig2-figsupp1-data1.xlsx]

## Sheet: Sheet1
Figure 2-figure supplement 1. Deletions of the pezo-1 gene cause a reduction in brood size
Panel C: The reduction in brood size of two other alleles pezo-1 (sy1199) and pezo-1 (sy1398)				The data were collected by n=3 independent experiments
Genotype	wt (0-36 hrs)	pezo-1(sy1199) (0-36 hrs)	pezo-1(sy1398) (0-36 hrs)	pezo-1 full deletion (av240) (0-36 hrs)	wt (36-60 hrs)	pezo-1(sy1199) (36-60 hrs)	pezo-1(sy1398) (36-60 hrs)	pezo-1 full deletion (av240) 36-60 hrs)	wt (0-60 hrs)	pezo-1(sy1199) (0-60 hrs)	pezo-1(sy1398) (0-60 hrs)	pezo-1 full deletion (av240) ( 0-60 hrs)
Temp. (ºC)	20ºC	20ºC	20ºC	20ºC	20ºC	20ºC	20ºC	20ºC	20ºC	20ºC	20ºC	20ºC
	Brood Size	Brood Size	Brood Size	Brood Size	Brood Size	Brood Size	Brood Size	Brood Size	Brood Size	Brood Size	Brood Size	Brood Size
	119	102	136	16	158	6	92	0	277	108	228	16
	166	109	132	8	144	12	94	0	310	121	226	8
	172	126	99	19	174	24	106	0	346	150	205	19
	149	124	133	25	130	60	41	5	279	184	174	30
	177	113	130	13	123	39	134	0	300	152	264	13
	162	122	117	12	201	62	108	0	363	184	225	12
	123	98	114	8	197	40	81	0	320	138	195	8
	138	109	127	10	125	37	126	0	263	146	253	10
	123	126	139	12	171	40	109	0	294	166	248	12
	145	114	123	15	171	19	107	0	316	133	230	15
	114	81	116	27	137	0	118	0	251	81	234	27
	150	100	102	21	160	69	115	0	310	169	217	21
	138	100	97	9	134	78	94	0	272	178	191	9
	131	107	135	18	97	35	107	0	228	142	242	18
	143		135	7	158		118	0	301		253	7
	149			18	153			0	302			18
				8				0				8
				17				0				17
				19				0				19
				25				0				25
Mean	143.688	109.357	122.333	15.35	152.062	37.2143	103.333	0.25	295.75	146.571	225.667	15.6
p-value from an unpaired 2 tailed t-test		****: p <0.0001 to wt (0-36 hrs)	***: p= 0.0003 to wt (0-36 hrs)	****: p <0.0001 to wt (0-36 hrs)		****: p<0.0001 to wt (36-60 hrs)	***: p= 0.0003 to wt (36-60 hrs)	****: p<0.0001 to wt (36-60 hrs)		****: p< 0.0001 towt (0-60 hrs)	****: p< 0.0001 towt (0-60 hrs)	****: p< 0.0001 towt (0-60 hrs)
Panel D: The reduction in brood size of pezo-1 deletion animals was enhanced when the animals were grown at 25°C.				The data were collected by n=3 independent experiments
Genotype	wt (0-24 hrs)	pezo-1 NΔ (0-24 hrs)	pezo-1 CΔ (0-24 hrs)	pezo-1 full deletion (av240) (0-24 hrs)	wt (24-48 hrs)	pezo-1 NΔ (24-48 hrs)	pezo-1 CΔ (24-48 hrs)	pezo-1 full deletion (av240) (24-48 hrs)	wt (48-60 hrs)	pezo-1 NΔ (48-60 hrs)	pezo-1 CΔ (48-60 hrs)	pezo-1 full deletion (av240) (48-60 hrs)	wt (0-60 hrs)	pezo-1 NΔ (0-60 hrs)	pezo-1 CΔ (0-60 hrs)	pezo-1 full deletion (av240) (0-60 hrs)
Temp. (ºC)	25 ºC	25 ºC	25 ºC	25 ºC	25 ºC	25 ºC	25 ºC	25 ºC	25 ºC	25 ºC	25 ºC	25 ºC	25 ºC	25 ºC	25 ºC	25 ºC
	Brood Size	Brood Size	Brood Size	Brood Size	Brood Size	Brood Size	Brood Size	Brood Size	Brood Size	Brood Size	Brood Size	Brood Size	Brood Size	Brood Size	Brood Size	Brood Size
	95	65	26	6	158	55	17	0	13	1	1	0	266	44	121	6
	104	60	7	6	140	63	0	0	2	0	0	0	243	7	123	6
	87	58	18	4	147	41	2	0	16	8	0	0	256	20	107	4
	93	54	21	7	155	41	0	0	16	0	0	0	256	21	95	7
	86	44	11	5	138	53	0	0	15	0	0	0	224	11	97	5
	72	54	24	8		56	0	0	14	4	0	0	265	24	114	8
	64			9				0				0	286			9
	72			14				0				0	228			14
	75			7				0				0	298			7
	81												254
	73												292
	67												321
	74												290
	89												248
	98
Mean	82	55.8333	17.8333	7.33333	147.6	51.5	3.16667	0	12.6667	2.16667	0.166667	0	266.214	21.1667	109.5	7.33333
p-value from an unpaired 2 tailed t-test		****: p <0.0001 to wt (0-24 hrs)	****: p <0.0001 to wt (0-24 hrs)	****: p <0.0001 to wt (0-24 hrs)		****: p <0.0001 to wt (24-48 hrs)	****: p <0.0001 to wt (24-48 hrs)	****: p <0.0001 to wt (24-48 hrs)		*: p= 0.0022 to wt (48-60 hrs)	**: p= 0.0021 to wt (48-60 hrs)	***: p= 0.0002 to wt (48-60 hrs)		****: p< 0.0001 towt (0-60 hrs)	****: p< 0.0001 to wt (0-60 hrs)	****: p< 0.0001 to wt (0-60 hrs)
