# Supplementary material for: Caenorhabditis elegans PIEZO channel coordinates multiple reproductive tissues to govern ovulation
Source: eLife. 2020 Jun 3;9:e53603. doi: 10.7554/eLife.53603 (PMC7340503; doi:10.7554/eLife.53603)
Supplement: Figure 2—source data 1. [file elife-53603-fig2-data1.xlsx]

## Sheet: Sheet1
Figure 2. Deletions of the pezo-1 gene cause a reduction in brood size
Panel A: Brood size in both pezo-1 NΔ and pezo-1 CΔ animals				The data were collected by n=4 independent experiments
Genotype	wt (0-36 hrs)	pezo-1 CΔ (0-36 hrs)	pezo-1 NΔ (0-36 hrs)	wt (36-60 hrs)	pezo-1 CΔ (36-60 hrs)	pezo-1 NΔ (36-60 hrs)	wt (0-60 hrs)	pezo-1 CΔ (0-60 hrs)	pezo-1 NΔ (0-60 hrs)
Temp. (ºC)	20ºC	20ºC	20ºC	20ºC	20ºC	20ºC	20ºC	20ºC	20ºC
	Brood Size	Brood Size	Brood Size	Brood Size	Brood Size	Brood Size	Brood Size	Brood Size	Brood Size
	96	65	58	107	29	75	203	94	133
	110	63	62	121	16	97	231	79	159
	112	61	87	120	0	98	232	61	185
	121	72	84	130	1	114	251	73	198
	84	64	77	98	27	102	182	91	179
	103	77	80	143	14	92	246	91	172
	87	66	52	141	76	61	228	142	113
	68	65	77	84	66	75	152	131	152
	74	83	70	129	63	82	203	146	152
	105	72	82	133	17	94	238	89	176
	93	76	77	85	32	93	178	108	170
	95	71	78	133	35	101	228	106	179
	88	56	80	123	8	103	211	64	183
	96	78	82	122	17	100	218	95	182
	93	79	92	132	21	98	225	100	190
	131	53	55	117	52	27	248	105	82
	118	83	37	134	24	84	252	107	121
	121	49	37	135	20	87	256	69	124
	127	65	34	123	22	92	250	87	126
	81	66	52	127	19	92	208	85	144
	62	85		101	5		163	90
	86	73		123	42		209	115
	93	78		108	29		201	107
	88	79		95	75		183	154
		101			22		277	123
		39			27		310	66
		49			64		346	113
		54			10		279	64
		38			13		300	51
		40			42		363	82
Mean	97.1667	66.6667	67.65	119.333	29.6	88.35	235.7	96.2667	156
p-value from an unpaired 2 tailed t-test		****: p <0.0001 to wt (0-36 hrs)	****: p <0.0001 to wt (0-36 hrs)		****: p<0.0001 to wt (36-60 hrs)	****: p <0.0001 to wt (36-60 hrs)		****: p<0.0001 to wt (0-60 hrs)	****: p <0.0001 to wt (0-60 hrs)
Panel B: The percentage of viable embryos was reduced in the pezo-1 CΔ animals				The data were collected by n=4 independent experiments
Genotype	wt (0-36 hrs)	pezo-1 CΔ (0-36 hrs)	pezo-1 NΔ (0-36 hrs)	wt (36-60 hrs)	pezo-1 CΔ (36-60 hrs)	pezo-1 NΔ (36-60 hrs)	wt (0-60 hrs)	pezo-1 CΔ (0-60 hrs)	pezo-1 NΔ (0-60 hrs)
Temp. (ºC)	20ºC	20ºC	20ºC	20ºC	20ºC	20ºC
	The Percentage of Viable Embryos	The Percentage of Viable Embryos	The Percentage of Viable Embryos	The Percentage of Viable Embryos	The Percentage of Viable Embryos	The Percentage of Viable Embryos
	98.9583	96.9231	100	100	75.8621	98.6667
	99.0909	92.0635	100	98.3471	62.5	96.9072
	100	62.2951	100	98.3333	92.5926	100
	100	86.1111	97.619	98.4615	100	99.1228
	98.8095	82.8125	100	95.9184	94.7368	97.0588
	100	96.1039	98.75	100	72.7273	95.6522
	91.954	98.4848	100	100	88.8889	83.6066
	94.1176	96.9231	100	98.8095	47.0588	86.6667
	100	91.5663	100	98.4496	78.125	98.7805
	100	97.2222	100	98.4962	82.8571	94.6809
	100	100	98.7013	99.2481	75	96.2963
	98.8636	97.1831	100	98.374	88.2353	98.8095
	100	96.4286	100	99.1803	71.4286	100
	100	98.7179	100	100	96.1538	97.8261
	100	93.6709	100	100	79.1667	96.7391
	100	90.3614	100	100	85
	100	89.7959	100	99.2593	95.4545
	99.2126	92.3077	100	100	73.6842
	100	89.3939	97.0588	100	96.2963
	100	95.2941	100	100	95.3125
	100	95.8904		97.561	90
	98.9247	98.7179		96.2963	92.3077
	100	100		96.8421	95.2381
		96.0396
		97.4359
		97.9592
		96.2963
		100
		97.5
Mean	99.1275	93.9137	99.6065	98.8512	83.8533	96.0542
p-value from an unpaired 2 tailed t-test		**: p= 0.0019 to wt (0-36 hrs)	n.s. to wt (0-36 hrs)		****: p <0.0001 to wt (36-60 hrs)	n.s. to wt (36-60 hrs)
Panel C: Brood size in WT and pezo-1 CΔ animals with dietary supplementation of Yoda-1				The data were collected by n=2 independent experiments
Genotype	wt (0-60 hrs) DMSO ctrl	wt (0-60 hrs) 20um Yoda-1	pezo-1 CΔ (0-60 hrs) DMSO ctrl	pezo-1 CΔ (0-60 hrs) 20um Yoda-1
Temp. (ºC)	20ºC	20ºC	20ºC	20ºC
	Brood Size	Brood Size	Brood Size	Brood Size
	328	210	44	61
	301	226	125	127
	286	210	129	129
	276	191	84	118
	333	213	117	133
	269	236	111	140
	209	135	139	120
	234	182	163	130
	287	155	124	146
	312	192	81	117
	312	219	111	171
	294	163	179	158
	307	223	119	159
	301	174	130	102
	322	190	77	141
	284	125	131	109
	290	144	118	122
	318	159	138
	307	213
	313	203
	286	154
	301	153
	209	171
	234	155
	287	130
	312	185
		186
		135
		182
		155
		192
		219
		163
		223
Mean	288.923	181.353	117.778	128.412
p-value from an unpaired 2 tailed t-test		****: p <0.0001 to wt (0-60 hrs)20um Yoda-1		n.s. to pezo-1 CΔ 20um Yoda-1
	Panel M: Quantification of sperm counts in both wild type and pezo-1 CΔ hermaphrodites at different time windows				The data were collected by n=2-3 independent experiments
Genotype	wt Prior to First Ovulation	pezo-1 CΔ Prior to First Ovulation	wt (0-24 hours) Post Mid-L4	pezo-1 CΔ (0-24 hours) Post Mid-L4	wt(24-48 hours) Post Mid-L4	pezo-1 CΔ (24-48 hours) Post Mid-L4
Temp. (ºC)	20ºC	20ºC	20ºC	20ºC	20ºC	20ºC
	Sperm Number/ Spermatheca	Sperm Number/ Spermatheca	Sperm Number/ Spermatheca	Sperm Number/ Spermatheca	Sperm Number/ Spermatheca	Sperm Number/ Spermatheca
	128	145	118	25	74	12
	152	161	128	28	74	91
	143	143	115	98	66	23
	150	150	102	75	14	0
		144	117	4	73	0
		132	112	104	54	0
			115	110	0	16
				141	50	2
				60	0	0
				67	0	0
				61	29	0
					20	0
					24	0
					39	9
					42	0
					20	0
					6	19
					16	0
					30	0
					34	0
						0
						0
						28
						6
						0
						5
						0
						0
						1
						6
						2
						0
						0
						4
						16
Mean	143.25	145.833	115.286	70.2727	33.25	6.85714
p-value from an unpaired 2 tailed t-test		n.s. to wt Prior to First Ovulation		*: p= 0.0120 to wt (0-24 hrs) Post Mid-L4		****: p= <0.0001 towt (24-48 hrs) Post Mid-L4
