# Supplementary material for: Caenorhabditis elegans PIEZO channel coordinates multiple reproductive tissues to govern ovulation
Source: eLife. 2020 Jun 3;9:e53603. doi: 10.7554/eLife.53603 (PMC7340503; doi:10.7554/eLife.53603)
Supplement: Figure 3—source data 1. [file elife-53603-fig3-data1.xlsx]

## Sheet: Sheet1
Figure 3: PEZO-1 mutants cause severe ovulation defects
Figure Panle	Strain (Genotype)	Number of Replicates Collected in This Study
Panel A-E	LP598 (dlg-1(cp301[dlg-1::mNG-C1^3xFlag]) X. CRISPR/Cas9 Edit)	n>5
Panel A'-E'	AG491 (pezo-1(av149) IV; dlg-1(cp301[dlg-1::mNG-C1^3xFlag]) X.)	n>5
Panel F-I	AG416 (pezo-1(av149) IV. CRISPR/Cas9 Edit)	n>5
Panel J-M	AG416 (pezo-1(av149) IV. CRISPR/Cas9 Edit)	n>5
