# Supplementary material for: Caenorhabditis elegans PIEZO channel coordinates multiple reproductive tissues to govern ovulation
Source: eLife. 2020 Jun 3;9:e53603. doi: 10.7554/eLife.53603 (PMC7340503; doi:10.7554/eLife.53603)
Supplement: Figure 4—source data 1. [file elife-53603-fig4-data1.xlsx]

## Sheet: Sheet1
Figure 4. pezo-1 mutants genetically interact with cytosolic Ca2+ regulators
Panel A: itr-1 (RNAi) reduced the brood size in pezo-1 CΔ animals. (The data were collected by n=3 independent experiments)
Genotype	wt (0-36 hrs); control (smd-1) RNAi	wt (0-36 hrs); itr-1 RNAi	pezo-1 CΔ (0-36 hrs); ; control (smd-1) RNAi	pezo-1 CΔ (0-36 hrs); itr-1 RNAi	wt (36-60 hrs); control (smd-1) RNAi	wt (36-60 hrs); itr-1 RNAi	pezo-1 CΔ (36-60 hrs); ; control (smd-1) RNAi	pezo-1 CΔ (36-60 hrs); itr-1 RNAi
Temp. (ºC)	20ºC	20ºC	20ºC	20ºC	20ºC	20ºC	20ºC	20ºC
	Brood Size	Brood Size	Brood Size	Brood Size	Brood Size	Brood Size	Brood Size	Brood Size
	121	114	57	46	103	114	0	0
	147	170	55	64	78	114	10	0
	150	129	69	57	113	119	3	0
	141	146	104	16	110	100	14	0
	113	160	87	35	129	94	0	7
	127	145	59	62	145	169	18	14
	114	110	69	25	183	141	56	0
	154	127	56	45	204	147	15	0
	135	168	78	30	164	137	31	0
	145	126	99	45	112	131	26	14
	137	170	93	31	213	114	32	0
	150	170	78	46	165	102	34	0
	160		83	46	136		6	3
	152		97		112		13
	147		41		135		72
	153		71		200		12
			44				17
			64				0
Mean	140.375	144.583	72.4444	42.1538	143.875	123.5	19.9444	2.92308
p-value from an unpaired 2 tailed t-test		n.s. to wt (0-36 hrs); control (smd-1) RNAi		****: p <0.0001 to pezo-1 CΔ (0-36 hrs); control (smd-1) RNAi		n.s. to wt (36-60 hrs); control (smd-1) RNAi		**: p=0.0048 to pezo-1 CΔ (36-60 hrs); control (smd-1) RNAi
Panel B: lfe-2 (RNAi) slightly rescued the smaller brood size in pezo-1 CΔ animals. (The data were collected by n=3 independent experiments)
Genotype	wt (0-36 hrs); control (smd-1) RNAi	wt (0-36 hrs); lfe-2 RNAi	pezo-1 CΔ (0-36 hrs); ; control (smd-1) RNAi	pezo-1 CΔ (0-36 hrs); lfe-2 RNAi	wt (36-60 hrs); control (smd-1) RNAi	wt (36-60 hrs); lfe-2 RNAi	pezo-1 CΔ (36-60 hrs); ; control (smd-1) RNAi	pezo-1 CΔ (36-60 hrs); lfe-2 RNAi
Temp. (ºC)	20ºC	20ºC	20ºC	20ºC	20ºC	20ºC	20ºC	20ºC
	Brood Size	Brood Size	Brood Size	Brood Size	Brood Size	Brood Size	Brood Size	Brood Size
	121	126	57	108	103	102	0	0
	147	119	55	140	78	111	10	26
	150	123	69	119	113	97	3	13
	141	150	104	117	110	94	14	13
	113	126	87	78	129	97	0	0
	127	126	59	88	145	185	18	8
	114	135	69	100	183	143	56	9
	154	120	56	78	204	160	15	28
	135	142	78	100	164	111	31	7
	145	120	99	96	112	188	26	51
	137	152	93	154	213	180	32	11
	150	160	78	98	165	197	34	11
	160		83		136		6
	152		97		112		13
	147		41		135		72
	153		71		200		12
			44				17
			64				0
Mean	140.375	133.25	72.4444	106.333	143.875	138.75	19.9444	14.75
p-value from an unpaired 2 tailed t-test		n.s. to wt (0-36 hrs); control (smd-1) RNAi		***: p=0.0001 to pezo-1 C-Δ (0-36 hrs); control (smd-1) RNAi		n.s. to wt (36-60 hrs); control (smd-1) RNAi		n.s. to pezo-1 C-Δ (36-60 hrs); control (smd-1) RNAi
Panel C: Depletion of both orai-1 and sca-1 by RNAi also enhanced the brood size reduction of pezo-1 CΔ mutants. (The data were collected by n=2 independent experiments)
Genotype	wt (0-36 hrs); control (smd-1) RNAi	wt (0-36 hrs); orai-1 RNAi	wt (0-36 hrs); sca-1 RNAi	pezo-1 CΔ (0-36 hrs); ; control (smd-1) RNAi	pezo-1 CΔ (0-36 hrs); orai-1 RNAi	pezo-1 CΔ (0-36 hrs); sca-1 RNAi
Temp. (ºC)	20ºC	20ºC	20ºC	20ºC	20ºC	20ºC
	Brood Size	Brood Size	Brood Size	Brood Size	Brood Size	Brood Size
	167	116	132	70	0	0
	127	61	125	91	0	0
	109	63	152	77	0	0
	95	68	103	62	0	0
	114	105	144	86	0	0
	108	2	140	67	0	0
	95		129	64	0	40
Mean	116.429	69.1667	132.143	73.8571	0	5.71429
p-value from an unpaired 2 tailed t-test		*: p=0.0250 to wt (0-36 hrs); control (smd-1) RNAi	n.s. to wt (0-36 hrs); control (smd-1) RNAi		****: p<0.0001 to pezo-1 CΔ (0-36 hrs); control (smd-1) RNAi	****: p<0.0001 to pezo-1 CΔ (0-36 hrs); control (smd-1) RNAi
