# Supplementary material for: Caenorhabditis elegans PIEZO channel coordinates multiple reproductive tissues to govern ovulation
Source: eLife. 2020 Jun 3;9:e53603. doi: 10.7554/eLife.53603 (PMC7340503; doi:10.7554/eLife.53603)
Supplement: Figure 5—source data 1. [file elife-53603-fig5-data1.xlsx]

## Sheet: Sheet1
Figure 5. PEZO-1 mutants show normal GCaMP3 fluorescence during ovulation
Genotype	wt; mScarlet::PEZO-1; fln-1p::GCaMP3	pezo-1 NΔ; mScarlet::PEZO-1; fln-1p::GCaMP3	pezo-1 CΔ; mScarlet::PEZO-1; fln-1p::GCaMP3
Temp. (ºC)	20ºC	20ºC	20ºC
	Dwell Time (Seconds)	Dwell Time (Seconds)	Dwell Time (Seconds)
	190	121	350
	315	207	264
	306	112	314
	68	111	309
	307	266	325
	201		387
	270		393
	215
Mean	234	163.4	334.571
p-value from an unpaired 2 tailed t-test		n.s. to wt; mScarlet::PEZO-1; fln-1p::GCaMP3	*: p= 0.0136 to wt; mScarlet::PEZO-1; fln-1p::GCaMP3
Genotype	wt; mScarlet::PEZO-1; fln-1p::GCaMP3	pezo-1 NΔ; mScarlet::PEZO-1; fln-1p::GCaMP3	pezo-1 CΔ; mScarlet::PEZO-1; fln-1p::GCaMP3
Temp. (ºC)	20ºC	20ºC	20ºC
	Value of fraction over half max	Value of fraction over half max	Value of fraction over half max
	0	0	0
	0	0.0338164	0
	0	0	0.022293
	0	0	0.0194175
	0	0.274436	0.169231
	0.114428		0.0749354
	0		0.0712468
	0.316279
	0
	0
	0
	0
	0
Mean	0.0331313	0.0616505	0.0510176
p-value from an unpaired 2 tailed t-test		n.s. to wt; mScarlet::PEZO-1; fln-1p::GCaMP3	n.s. to wt; mScarlet::PEZO-1; fln-1p::GCaMP3
Genotype	wt; mScarlet::PEZO-1; fln-1p::GCaMP3	pezo-1 NΔ; mScarlet::PEZO-1; fln-1p::GCaMP3	pezo-1 CΔ; mScarlet::PEZO-1; fln-1p::GCaMP3
Temp. (ºC)	20ºC	20ºC	20ºC
	Rising Time (Seconds)	Rising Time (Seconds)	Rising Time (Seconds)
	412	439	527
	369	268	419
	335	378	345
	317	272	357
	407	215	352
	291		487
	447		468
	456
	13
	552
	270
	488
	257
Mean	354.923	314.4	422.143
p-value from an unpaired 2 tailed t-test		n.s. to wt; mScarlet::PEZO-1; fln-1p::GCaMP3	n.s. to wt; mScarlet::PEZO-1; fln-1p::GCaMP3
