# Supplementary material for: Caenorhabditis elegans PIEZO channel coordinates multiple reproductive tissues to govern ovulation
Source: eLife. 2020 Jun 3;9:e53603. doi: 10.7554/eLife.53603 (PMC7340503; doi:10.7554/eLife.53603)
Supplement: Figure 6—figure supplement 1—source data 1. [file elife-53603-fig6-figsupp1-data1.xlsx]

## Sheet: Sheet1
Figure 6- figure supplement 1. Male sperm rescue the fecundity in pezo-1 CΔ female
Panel A: Quantification of brood size of fem-1(hc17) females and pezo-1 CΔ females				The data were collected by n=2 independent experiments
Genotype	wt (0-60 hrs)	pezo-1 CΔ (0-60 hrs)	fem-1(hc17) (0-60 hrs)	pezo-1 CΔ; fem-1(hc17) (0-60 hrs)
Temp. (ºC)	15ºC	15ºC	15ºC	15ºC
	Brood Size	Brood Size	Brood Size	Brood Size
	199	49	164	106
	207	51	174	144
	203	103	273	106
	188	36	195	94
	197	88	51	92
	217		225	85
	217		116	124
	171		208	72
	115			88
	206			93
Mean	192	65.4	175.75	100.4
p-value from an unpaired 2 tailed t-test		****: p<0.0001 to wt (0-60 hrs)		**: p=0.0014 to fem-1(hc17) (0-60 hrs)
Panel B: Quantification of Mito tracker stained male sperm in the female uteri				The data were collected by n=2 independent experiments
Genotype	wt ♂ X fem-1(hc17)	pezo-1 CΔ ♂ X fem-1(hc17)	wt ♂ X fem-1(hc17); pezo-1 CΔ	pezo-1 CΔ ♂ X fem-1(hc17); pezo-1 CΔ
Temp. (ºC)	25ºC	25ºC	25ºC	25ºC
	Sperm Number	Sperm Number	Sperm Number	Sperm Number
	177	436	489	291
	472	50	811	84
	414	419	275	250
	160	52	264	489
	128	73	703	77
	93	98	360	206
	244		799	183
	646		561	89
	402			774
	697
Mean	343.3	188	532.75	271.444
p-value from an unpaired 2 tailed t-test		n.s. to wt ♂ X fem-1(hc17)		*: p=0.0031 to wt ♂ X fem-1(hc17); pezo-1 CΔ
Panel C: pezo-1 C∆ and wildtype males sire progeny when mated with females				The data were collected by n=2 independent experiments
Genotype	fem-1(hc17)	fem-1(hc17); pezo-1 CΔ	wt ♂ X fem-1(hc17)	pezo-1 CΔ ♂ X fem-1(hc17)	wt ♂ X fem-1(hc17); pezo-1 CΔ	pezo-1 CΔ ♂ X fem-1(hc17); pezo-1 CΔ
Temp. (ºC)	25ºC	25ºC	25ºC	25ºC	25ºC	25ºC
	Brood Size	Brood Size	Brood Size	Brood Size	Brood Size	Brood Size
	0	0	124	173	39	11
	0	0	194	125	40	9
	0	0	154	45	62	53
	0	0	97	49	2	29
	0	0	99	95	34	17
	0	0	75		15	1
	0	0	111		28	17
	0	0	117		17	2
	0	0	239		6	14
	0	0	196
		0
Mean	0	0	140.6	97.4	27	17
p-value from an unpaired 2 tailed t-test		n.s. to fem-1(hc17)		n.s. to wt ♂ X fem-1(hc17)		n.s. to wt ♂ X fem-1(hc17); pezo-1 CΔ
Panel D: Fertilization ratio [(laid embryos/stained sperm) *100%] in different females.				The data were collected by n=2 independent experiments
Genotype	wt ♂ X fem-1(hc17)	pezo-1 CΔ ♂ X fem-1(hc17)	wt ♂ X fem-1(hc17); pezo-1 CΔ	pezo-1 CΔ ♂ X fem-1(hc17); pezo-1 CΔ
Temp. (ºC)	25ºC	25ºC	25ºC	25ºC
	% of Fertilization Rate	% of Fertilization Rate	% of Fertilization Rate	% of Fertilization Rate
	70.0565	39.6789	7.97546	3.78007
	41.1017	29.8329	7.42115	10.7143
	37.1981	86.5385	7.12644	21.2
	60.625	67.1233	0.917431	5.93047
	77.3438	96.9388	18.7845	22.0779
	80.6452		3.23974	0.485437
	45.4918		14.2132	9.28962
	18.1115		3.7037	2.24719
	59.4527		1.54639	1.80879
	28.1205
Mean	51.8147	64.0225	7.21423	8.61486
p-value from an unpaired 2 tailed t-test		n.s. to fem-1(hc17)	****: p<0.0001 to wt ♂ X fem-1(hc17)	n.s. to wt ♂ X fem-1(hc17)
				***: p=0.0001 to pezo-1 CΔ ♂ X fem-1(hc17)
Panel E: Quantification of sperm distribution in the pezo-1 C∆ female after mating 30 minutes				The data were collected by n=3 independent experiments
Genotype	wt ♂ X fem-1(hc17)	wt ♂ X fem-1(hc17); pezo-1 CΔ	pezo-1 CΔ ♂ X fem-1(hc17)	pezo-1 CΔ ♂ X fem-1(hc17); pezo-1 CΔ
Temp. (ºC)	25ºC	25ºC	25ºC	25ºC
	Sperm Distribution % in Zone 1	Sperm Distribution % in Zone 1	Sperm Distribution % in Zone 1	Sperm Distribution % in Zone 1
	13.253	20.9559	2.22222	13.4021
	2.25989	15.8273	1.66667	68
	5.76923	17.5439	0	2.80374
	0	1.20482	4.34783	8.37696
	6.50685	11.25	4.7619	25.9259
	7.44681	19.0184	0	19.5402
	11.5502	15.2941	2.99003	41.0526
	3.83142	23.1214	0	21.2121
	7.44681	9.73783	2.38095	11.306
	0	14.8649	3.35196	17.5258
	0.416667	16.7702	0	25.4237
	0	6.12245	0	4.1958
	1.75055	0.896861	2.17391	8.38926
	7.72358	23.5294		22
	2.8169	7.56303		14.2857
		8.37209		38.6364
				5.35714
				6.89655
Mean	4.71812	13.2545	1.81013	19.685
p-value from an unpaired 2 tailed t-test
	Sperm Distribution % in Zone 2	Sperm Distribution % in Zone 2	Sperm Distribution % in Zone 2	Sperm Distribution % in Zone 2
	4.81928	17.6471	2.5	61.8557
	2.25989	38.1295	9.09091	8
	3.84615	59.6491	0	0.934579
	0	13.253	0	35.0785
	3.76712	8.75	1.92308	40.7407
	9.18367	50.9202	1.66113	50.5747
	8.20669	32.9412	4.65116	31.5789
	9.00383	37.5723	0	69.697
	6.38298	44.1948	4.7619	37.4269
	2.71186	13.1757	1.67598	49.4845
	1.66667	63.9752	0	37.2881
	6.12245	60.2041	2	9.09091
	4.15755	18.8341	0	54.3624
	0	41.1765		62
	11.9718	21.0084		45.3782
		25.5814		36.3636
				67.8571
				36.0153
Mean	4.94	34.1883	2.35535	40.7626
p-value from an unpaired 2 tailed t-test
	Sperm Distribution % in Zone 3	Sperm Distribution % in Zone 3	Sperm Distribution % in Zone 3	Sperm Distribution % in Zone 3
	81.9277	61.3971	97.7778	24.7423
	95.4802	46.0432	95.8333	24
	90.3846	22.807	90.9091	96.2617
	100	85.5422	95.6522	56.5445
	89.726	80	95.2381	33.3333
	86.7347	30.0613	98.0769	29.8851
	80.2432	51.7647	95.3488	27.3684
	87.1648	39.3064	95.3488	9.09091
	86.1702	46.0674	92.8571	51.2671
	97.2881	71.9595	94.9721	32.9897
	97.9167	19.2547	100	37.2881
	93.8776	33.6735	98	86.7133
	94.0919	80.2691	97.8261	37.2483
	92.2764	35.2941		16
	85.2113	71.4286		40.3361
		66.0465		25
				26.7857
				57.0881
Mean	90.5662	52.5572	95.8345	39.5524
p-value from an unpaired 2 tailed t-test		****: p <0.0001 to wt ♂ X fem-1(hc17)	n.s.: p <0.0001 to wt ♂ X fem-1(hc17)	n.s. to wt ♂ X fem-1(hc17)
				****: p <0.0001 to pezo-1 CΔ ♂ X fem-1(hc17)
