# Supplementary material for: Caenorhabditis elegans PIEZO channel coordinates multiple reproductive tissues to govern ovulation
Source: eLife. 2020 Jun 3;9:e53603. doi: 10.7554/eLife.53603 (PMC7340503; doi:10.7554/eLife.53603)
Supplement: Figure 6—source data 1. [file elife-53603-fig6-data1.xlsx]

## Sheet: Sheet1
Figure 6 Male sperm rescue the ovulation defects in pezo-1 mutants
Panel A: Both pezo-1 C-∆ and pezo-1 N-∆ males are fertile and sire progeny when mated with fem-1(hc17ts) mutants (The data were collected by n=2 independent experiments)
Genotype	fem-1(hc17)	wt ♂ X fem-1(hc17)	pezo-1 NΔ X fem-1(hc17)	pezo-1 CΔ X fem-1(hc17)
Temp. (ºC)	20ºC	20ºC	20ºC	20ºC
	Brood Size	Brood Size	Brood Size	Brood Size
	0	167	170	118
	0	175	151	103
	0	166	152	108
	0	99	126	104
	0	159	13	128
		144	102	15
		132	132	124
		83	6	103
		80	141	90
		81	11
		107	125
		134	89
		72	104
Mean	0	123	101.692	99.2222
p-value from an unpaired 2 tailed t-test			n.s. to WT ♂ X fem-1(hc17)	n.s. to WT ♂ X fem-1(hc17)
Panel B: Mating with male sperm rescued fertility in day 3 pezo-1 C-Δ adults (72 hours post mid-L4). (The data were collected by n=3 independent experiments)
Genotype	wt	wt ♂ X wt	pezo-1 NΔ ♂ X wt	pezo-1 CΔ ♂ X wt	pezo-1 CΔ	wt ♂ X pezo-1 CΔ	pezo-1 NΔ ♂ X pezo-1 CΔ	pezo-1 CΔ ♂ X pezo-1 CΔ
Temp. (ºC)	20ºC	20ºC	20ºC	20ºC	20ºC	20ºC	20ºC	20ºC
	2	140	172	154	0	19	0	3
	3	209	171	156	0	75	9	2
	2	151	214	168	0	146	0	3
	0	150	208	65	0	23	17	23
	1	178	161	185	0	19	6	12
	4		180	150	0	15	45	0
	0		191		0	72	3	27
	2		63		0	0	31	0
	9		198		0	136	18	1
	21		179		0	0	14	17
					0	0	48
					0	117	62
					0	0	61
					0	0	13
					0	55	40
					0	0	1
					0	0	0
					0	16
					0	109
					0	0
					0	8
					0	1
					0	22
					0	63
					0	0
					0	0
					0	0
					0	108
					0
					0
					0
					0
					0
Mean	4.4	165.6	173.7	146.333	0	35.8571	21.6471	8.8
p-value from an unpaired 2 tailed t-test		****: p<0.0001 to wt	****: p<0.0001 to wt	****: p<0.0001 to wt		****: p<0.0001 to pezo-1 C-Δ	****: p <0.0001 to pezo-1 C-Δ	****: p<0.0001 to pezo-1 C-Δ
