# Supplementary material for: Caenorhabditis elegans PIEZO channel coordinates multiple reproductive tissues to govern ovulation
Source: eLife. 2020 Jun 3;9:e53603. doi: 10.7554/eLife.53603 (PMC7340503; doi:10.7554/eLife.53603)
Supplement: Figure 7—source data 1. [file elife-53603-fig7-data1.xlsx]

## Sheet: Sheet1
Figure 7 Sperm guidance and navigation is disrupted in pezo-1 mutants
Panel H: Quantification of sperm distribution values (The data were collected by n=3 independent experiments)
Genotype	wt ♂ X wt	wt ♂ X pezo-1 CΔ	pezo-1 CΔ ♂ X wt	pezo-1 CΔ ♂ X pezo-1 CΔ
Temp. (ºC)	20ºC	20ºC	20ºC	20ºC
	Sperm Distribution % in Zone 1	Sperm Distribution % in Zone 1	Sperm Distribution % in Zone 1	Sperm Distribution % in Zone 1
	0.970874	76.4706	4.65116	91.6667
	0	36	4.87805	100
	2.52101	34.0909	0	100
	0	58.3333	0	86.6667
	1.66667	45	0	31.746
	0.440529	39.2405	3.27869	80
	2.58303	46.2585	9.09091	61.0687
	0	53.8462	0	47.2222
	1.24224	23.4375	44.9438
	0	37.2881	4.81928
	6.97674	30.4348	58.3333
	2.71493	34.4086	19.0476
	3.80228	34.6939
	30	29.0909
	2.21239	28.8591
		4.9505
		38.6935
		51.8518
		34.375
		6.57895
		5.04202
Mean	3.67538	35.664	12.4202	74.7963
p-value from an unpaired 2 tailed t-test		****: p <0.0001 to wt ♂ X wt	n.s. to wt ♂ X wt	****: p<0.0001 to pezo-1 CΔ ♂ X wt
	Sperm Distribution % in Zone 2	Sperm Distribution % in Zone 2	Sperm Distribution % in Zone 2	Sperm Distribution % in Zone 2
	2.91262	14.7059	20.9302	8.33333
	0	9	9.7561	0
	4.20168	65.9091	0	0
	4.34783	41.6667	5.55556	13.3333
	0	55	1.11111	41.2698
	1.76212	60.7595	3.27869	12.2581
	4.79705	21.0884	9.09091	34.3511
	4.91803	23.0769	8.33333	5.55556
	0.621118	3.125	5.61798
	0	12.7119	4.81928
	9.30233	28.9855	21.4286
	2.71493	65.5914	9.52381
	3.04182	9.69388
	4	40
	0.884956	29.5302
		20.7921
		13.0653
		25.9259
		51.5625
		2.63158
		29.4118
Mean	2.9003	29.7254	8.28713	14.3877
p-value from an unpaired 2 tailed t-test		****: p <0.0001 to wt ♂ X wt	**: p =0.0088 to wt ♂ X wt	n.s. to pezo-1 CΔ ♂ X wt
	Sperm Distribution % in Zone 3	Sperm Distribution % in Zone 3	Sperm Distribution % in Zone 3	Sperm Distribution % in Zone 3
	96.1165	8.82353	74.4186	0
	100	55	85.3658	0
	93.2773	0	100	0
	95.6522	0	94.4444	0
	98.3333	0	98.8889	26.9841
	97.7974	0	93.4426	7.74194
	92.6199	32.6531	81.8182	4.58015
	95.082	23.0769	91.6667	47.2222
	98.1367	73.4375	49.4382
	100	50	90.3614
	83.7209	40.5797	20.2381
	94.5701	0	71.4286
	93.1559	55.6122
	66	30.9091
	96.9026	41.6107
		74.2574
		48.2412
		22.2222
		14.0625
		90.7895
		65.5462
Mean	93.4243	34.6106	79.2926	10.8161
p-value from an unpaired 2 tailed t-test		****: p <0.0001 to wt ♂ X wt	**: p =0.0088 to wt ♂ X wt	n.s. to pezo-1 CΔ ♂ X wt
