# Supplementary material for: Caenorhabditis elegans PIEZO channel coordinates multiple reproductive tissues to govern ovulation
Source: eLife. 2020 Jun 3;9:e53603. doi: 10.7554/eLife.53603 (PMC7340503; doi:10.7554/eLife.53603)
Supplement: Figure 8—figure supplement 2—source data 1. [file elife-53603-fig8-figsupp2-data1.xlsx]

## Sheet: Sheet1
Figure 8-figure supplement 2. Tissue-specific degradation of PEZO-1 displays a reduced GFP::PEZO-1 fluorescence in each tissue expressing tir-1::mRuby
Panel H: Quantification of the fluorescent signals of GFP::PEZO-1::Degron at the germline
Genotype	GFP::PEZO-1::Degron Ctrl Germline	GFP::PEZO-1::Degron Auxin Germline	GFP::PEZO-1::Degron; Peft-3::tir-1 Ctrl Germline	GFP::PEZO-1::Degron; Peft-3::tir-1Auxin Germline	GFP::PEZO-1::Degron; Ppie-1::tir-1 Ctrl Germline	GFP::PEZO-1::Degron; Ppie-1::tir-1Auxin Germline	GFP::PEZO-1::Degron; Psun-1::tir-1 Ctrl Germline	GFP::PEZO-1::Degron; Psun-1::tir-1Auxin Germline
	1.86291	2.57419	2.00928	2.67499	2.42827	1.35951	1.81797	1.48143
	1.77856	2.71748	2.05476	2.39028	2.45685	1.45939	1.89151	1.48501
	1.98583	2.9648	2.00153	1.6358	1.89937	1.46546	1.93378	1.44736
	2.04275	2.10855	2.17956	2.19747	3.48363	1.40304	1.81147	1.43182
	2.34654	2.07003	2.35313	1.91045	2.98881	1.39136	1.57389	1.39906
	2.83793	2.35992	2.03451	1.94152	3.13828	1.48114	2.07629	1.45468
	1.85366	2.02587	1.58845	1.77206	2.96618	1.28902	2.37313	1.32102
	2.06145	2.00946	1.80785	2.15394	3.23547	1.38175	2.35987	1.27866
	2.06884	2.14942	1.80087	1.91471	3.20929	1.37625	3.12935	1.40455
	1.60153		2.28545	2.10894	2.37105	1.4138	1.96452	1.3323
	1.49814		2.07352	1.87691	2.27513	1.38516	2.06	1.38033
	1.6448		1.98445	1.99015	2.89307	1.52931	2.5813	1.40631
	2.79702		2.00224	1.98886	3.78693		1.70389	1.5319
	3.02762		1.85448	2.3284	3.44063		1.58751	1.56894
	2.80226		2.19754	2.64991	2.99436		1.82246	1.64524
	1.74632			2.3394	1.93899		1.81154	1.41971
	2.09685			2.33198	2.36264		2.32004	1.40735
	2.06653			2.04759	2.08027		1.9595	1.53942
	2.38907			2.03788	1.73427
	1.98439			1.90156	1.76674
	1.94139			1.88616	1.92342
	1.91024			2.14131	1.71697
	2.06061			2.14131	1.59623
	2.0707			2.14131	1.59689
	1.8996			2.36693	2.91096
	1.74773			1.92441	2.82965
	2.12468			2.10844	3.03049
	1.70002
	1.8637
	1.87068
Mean	2.05608	2.33108	2.01517	2.10751	2.55759	1.41126	2.04322	1.44084
p-value from an unpaired 2 tailed t-test		n.s. to GFP::PEZO-1::Degron Ctrl Germline		n.s. to GFP::PEZO-1::Degron; Peft-3::tir-1 Ctrl Germline		****: p<0.0001 to GFP::PEZO-1::Degron; Ppie-1::tir-1 Ctrl Germline		****: p<0.0001 to GFP::PEZO-1::Degron; Psun-1::tir-1 Ctrl Germline
	Panel I: Quantification of the fluorescent signals of GFP::PEZO-1::Degron at the spermatheca
Genotype	GFP::PEZO-1::Degron Ctrl Spermatheca	GFP::PEZO-1::Degron Auxin Spermatheca	GFP::PEZO-1::Degron; Peft-3::tir-1 Ctrl Spermatheca	GFP::PEZO-1::Degron; Peft-3::tir-1Auxin Spermatheca	GFP::PEZO-1::Degron; Ppie-1::tir-1 Ctrl Spermatheca	GFP::PEZO-1::Degron; Ppie-1::tir-1Auxin Spermatheca	GFP::PEZO-1::Degron; Psun-1::tir-1 Ctrl Spermatheca	GFP::PEZO-1::Degron; Psun-1::tir-1Auxin Spermatheca
	2.37359	2.54705	2.65411	1.31014	2.52533	2.25158	2.29286	2.38037
	2.21911	3.03622	2.6474	1.42908	2.67968	2.14031	2.51548	2.88167
	2.35436	2.71865	2.49496	1.39358	2.49604	2.34693	2.58356	2.46804
	1.9972	1.96037	2.34888	1.48033	3.51007	2.50809	2.02797	3.21474
	2.01783	1.79315	1.8543	1.43333	4.38937	2.49256	1.9818	2.94262
	1.62432	2.04664	2.236	1.36347	3.84359	2.0856	2.58029	2.31128
	2.65278	2.34931	2.35915	1.21294	2.62592	3.23978	2.29662	2.68807
	2.78866	2.67763	1.88008	1.38916	2.08206	3.43853	2.55388	2.57999
	2.63716	2.53685	2.40092	1.24865	2.65785	2.68218	2.61989	2.23135
	2.75672	2.30037	2.32792	1.33785	2.61669	2.68833	2.9088	2.81239
	2.14391	2.38117	2.48843	1.36607	2.75668	2.3273	2.79179	2.57358
	2.51313	2.6548	2.43644	1.34138	2.76042	2.19552	2.52706	2.67981
	1.54762		2.09329	1.17602	2.40334	2.18154	2.39855	2.46283
	1.67919		2.40428	1.22018	2.48901	1.8332	2.38824	2.08301
	1.4832		2.18828	1.30886	2.33808	1.80925	2.30242	2.34575
	2.221			1.43491	2.65607	2.37496	2.65693	2.7011
	2.34993			1.38079	2.68716	2.55273	2.69631	2.92304
	2.11225			1.35081	2.47698	2.46842	2.36485	2.80728
	2.03972			1.37916	1.86916
	2.0131			1.24699	2.45804
	2.04341			1.29609	2.04506
	2.23487			1.29248	1.71697
	2.19254			1.24812	1.59623
	2.06634			1.24147	1.59689
	2.52985			1.43261
	2.7658			1.43262
	2.47515			1.35241
	2.14291
	2.54887
	2.57527
Mean	2.23666	2.41685	2.32096	1.33702	2.59477	2.42316	2.47152	2.61594
p-value from an unpaired 2 tailed t-test		n.s. to GFP::PEZO-1::Degron Ctrl Spermatheca		****: p<0.0001 to GFP::PEZO-1::Degron; Peft-3::tir-1 Ctrl Spermatheca		n.s. to GFP::PEZO-1::Degron; Ppie-1::tir-1 Ctrl Spermatheca		n.s. to GFP::PEZO-1::Degron; Psun-1::tir-1 Ctrl Spermatheca
