# Supplementary material for: Caenorhabditis elegans PIEZO channel coordinates multiple reproductive tissues to govern ovulation
Source: eLife. 2020 Jun 3;9:e53603. doi: 10.7554/eLife.53603 (PMC7340503; doi:10.7554/eLife.53603)
Supplement: Figure 8—source data 1. [file elife-53603-fig8-data1.xlsx]

## Sheet: Sheet1
Figure 8. Tissue-specific degradation of PEZO-1 displays a reduced brood size and causes sperm navigational defects
Panel E: Brood size were reduced in all degron strains when animals were treated with 1 mM or 2 mM auxin (0-36 hrs Post Mid-L4)				The data were collected by n=3 independent experiments
Genotype	wt; ctrl (0-60 hrs)	wt; auxin (0-60 hrs)	pezo-1::degron; ctrl (0-60 hrs)	pezo-1::degron; auxin (0-60 hrs)	Peft-3::tir-1 only; ctrl (0-60 hrs)	Peft-3::tir-1 only; auxin (0-60 hrs)	Ppie-1::tir-1 only; ctrl (0-60 hrs)	Ppie-1::tir-1 only; auxin (0-60 hrs)	Psun-1::tir-1 only; ctrl (0-60 hrs)	Psun-1::tir-1 only; auxin (0-60 hrs)	Peft-3::tir-1; pezo-1::degron; ctrl (0-60 hrs)	Peft-3::tir-1; pezo-1::degron; auxin (0-60 hrs)	Ppie-1::tir-1; pezo-1::degron; ctrl (0-60 hrs)	Ppie-1::tir-1; pezo-1::degron; auxin (0-60 hrs)	Psun-1::tir-1; pezo-1::degron; ctrl (0-60 hrs)	Psun-1::tir-1; pezo-1::degron; auxin (0-60 hrs)
Temp. (ºC)	20ºC	20ºC	20ºC	20ºC	20ºC	20ºC	20ºC	20ºC	20ºC	20ºC	20ºC	20ºC	20ºC	20ºC	20ºC	20ºC
	Brood Size	Brood Size	Brood Size	Brood Size	Brood Size	Brood Size	Brood Size	Brood Size	Brood Size	Brood Size	Brood Size	Brood Size	Brood Size	Brood Size	Brood Size	Brood Size
	338	277	335	383	277	315	338	351	340	302	270	199	257	228	349	237
	344	383	352	391	287	323	349	343	315	281	272	189	231	228	300	221
	362	363	372	370	283	265	340	302	314	359	255	172	225	150	286	168
	329	323	328	367	320	285	296	285	288	290	312	140	262	232	310	163
	306	338	323	288	251	300	295	316	219	277	293	179	279	241	330	197
	275	298	320	253	302	243	230	344	291	241	278	185	276	221	327	233
	298	240	300	246	327	298	309	295	259	234	307	194	283	259	333	193
	230	302	298	329	281	251	254	290	271	284	277	129	235	154	344	261
	268	293	230	321	292	264	253	281	217	282	271	233	272	238	275	231
	309	297	301	255	225	324	299	302	265	215	358	206	316	264	262	172
	302	343	298	320	264	289		241	269	326	322	239	325	256	288	222
		279	334			289		279	279	270	275	212	281	256	287	231
						291					277	201	285	130	293	237
											337	196	297	217	258	225
											312	202	257	212	255	234
											314	269	283	216	330	170
											273	207	223	183	344	223
											259	199	247	237	322	198
											326	212	300	214		202
											311	169	258	188		211
											279	240	280	177
											247	215	272	168
												196	312	172
												241	290	161
												171	345	171
												143	267
												165
												200
												153
Mean	305.545	311.333	315.917	320.273	282.636	287.462	296.3	302.417	277.25	280.083	292.045	195.034	275.308	206.92	305.167	211.45
p-value from an unpaired 2 tailed t-test		n.s. to wt auxin (0-60 hrs)		n.s. to pezo-1::degron auxin (0-60 hrs)		n.s. to Peft-3::tir-1 only; auxin (0-60 hrs)		n.s. to Ppie-1::tir-1 only; auxin (0-60 hrs)		n.s. to Psun-1::tir-1 only; auxin (0-60 hrs)		****: p <0.0001 to Peft-3::tir-1; pezo-1::degron; auxin (0-60 hrs)		****: p <0.0001 to Ppie-1::tir-1; pezo-1::degron; auxin (0-60 hrs)		****: p <0.0001 to Psun-1::tir-1; pezo-1::degron; auxin (0-60 hrs)
Panel F: Embryonic viability were reduced in all degron strains when animals were treated with 1 mM or 2 mM auxin (0-60 hrs Post Mid-L4)				The data were collected by n=3 independent experiments
Genotype	Peft-3; ctrl (0-60 hrs)	Peft-3; auxin (0-60 hrs)	Ppie-1; ctrl (0-60 hrs)	Ppie-1; auxin (0-60 hrs)	Psun-1; ctrl (0-60 hrs)	Psun-1; auxin (0-60 hrs)
Temp. (ºC)	20ºC	20ºC	20ºC	20ºC	20ºC	20ºC
	Embryonic Viability	Embryonic Viability	Embryonic Viability	Embryonic Viability	Embryonic Viability	Embryonic Viability
	99.6296	96.4824	99.2218	97.3684	99.7135	93.2489
	98.8971	97.3545	100	95.614	97.6667	87.3303
	98.0392	97.093	98.2222	98.6667	96.8531	85.7143
	100	99.2857	96.1832	95.6897	98.7097	88.9571
	98.2935	97.2067	99.2832	95.0207	100	86.2944
	98.9209	98.3784	99.6377	99.095	99.3884	96.1373
	100	98.9691	98.9399	97.6834	99.0991	86.0104
	98.556	98.4496	97.8723	98.7013	99.4186	95.7854
	100	99.5708	99.2647	94.5378	99.6364	99.5671
	98.8827	99.0291	98.7342	97.7273	99.2366	98.2558
	99.0683	99.1632	99.3846	99.2188	99.6528	98.6486
	100	99.0566	98.5765	92.9688	99.6516	99.5671
	100	99.005	98.9474	98.4615	98.9761	98.3122
	100	100	100	98.1567	98.062	99.5556
	100	99.505	97.2763	98.5849		97.8632
	100	99.6283	96.8198	98.1481
	100	99.5169	98.2063	97.2678
	99.2278	99.4975	99.1903	97.4684
		97.6415	98.3333	98.5981
			98.4496	98.9362
			98.5714
			99.2647
Mean	99.4175	98.6754	98.6536	97.3957	99.0046	94.0832
p-value from an unpaired 2 tailed t-test		*: p = 0..146 to Peft-3; ctrl (0-60 hrs)		**: p = 0.0053 to Ppie-1; ctrl (0-60 hrs)		**: p = 0.0030 to Psun-1; ctrl (0-60 hrs)
Panel K: Quantification of sperm distribution in the PEZO-1::Degron strain grown on plates with (+) or without (-) 2 mM auxin					The data were collected by n=3 independent experiments
	wt ♂ X Ppie-1; No-auxin	wt ♂ X Ppie-1; 2 mM auxin	wt ♂ X Pefl-3; No-auxin	wt ♂ X Peft-3; 2 mM auxin
Temp. (ºC)	20ºC	20ºC	20ºC	20ºC
	Sperm Distribution % in Zone 1	Sperm Distribution % in Zone 1	Sperm Distribution % in Zone 1	Sperm Distribution % in Zone 1
	41.8605	0	4.48718	2.35294
	16.4706	20.8633	11.3208	3.125
	3.125	13.245	43.9024	6.45161
	2.17391	31.5985	9.92908	1.9802
	8.33333	9	1.10497	2.54777
	5.47945	3.97727	11.1111	0
	1.49254	8.83621	2.5	0
	4.44444	10.8871	11.6279	0
	12.1212	1.33333	2.94118
	1.69491	2.17391	1.02389
	6.32911	5.7971	8.51064
	0.649351	27.6397	5.64516
	3.2	19.7802	6.08696
	1.7094	12.2363	2.85714
	5.31401	4.3956	2.5974
	4.87805	14.8936	8.17308
	4.04624	13.6364	7.5
	2.17391	6.73759	1.36986
	10.2485	6.66667	9.62567
	0	4.58015
	3.1746	6.97674
	7.86517
	1.24224
	6.03448
	6.55738
Mean	6.42473	10.7264	8.01655	2.05719
p-value from an unpaired 2 tailed t-test		n.s. to wt ♂ X Ppie-1; No-auxin		n.s. to wt ♂ X PPefl-3; No-auxin
	Sperm Distribution % in Zone 2	Sperm Distribution % in Zone 2	Sperm Distribution % in Zone 2	Sperm Distribution % in Zone 2
	2.32558	4.21053	4.48718	8.23529
	16.4706	11.5108	5.66038	28.125
	9.375	37.4172	4.87805	12.9032
	8.69565	26.7658	8.51064	5.94059
	4.62963	9	3.31492	18.4713
	2.73973	6.81818	3.1746	17.5824
	1.49254	29.3103	5	1.28205
	5.18518	8.06452	3.10078	8.03571
	9.09091	6.66667	8.82353
	1.27119	36.9565	1.36519
	5.06329	18.8406	2.12766
	2.5974	27.3292	9.67742
	8	21.4286	8.69565
	13.0342	27.0042	3.80952
	6.28019	16.4835	3.8961
	5.4878	7.44681	8.17308
	6.93642	44.1558	6.66667
	7.24638	14.1844	9.13242
	5.90062	20.9524	5.34759
	7.89474	9.92366
	3.57143	33.7209
	4.49438
	0.621118
	3.44828
	7.37705
Mean	5.96917	19.9138	5.5706	12.572
p-value from an unpaired 2 tailed t-test		****: p <0.0001 to wt ♂ X Ppie-1; No-auxin		**: p = 0.0029 to wt ♂ X PPefl-3; No-auxin
	Sperm Distribution % in Zone 3	Sperm Distribution % in Zone 3	Sperm Distribution % in Zone 3	Sperm Distribution % in Zone 3
	55.814	95.7895	91.0256	89.4118
	67.0588	67.6259	83.0189	68.75
	87.5	49.3377	51.2195	80.6452
	89.1304	41.6357	81.5603	92.0792
	87.037	82	95.5801	78.9809
	91.7808	89.2045	85.7143	82.4176
	97.0149	61.8535	92.5	98.718
	90.3704	81.0484	85.2713	91.9643
	78.7879	92	88.2353
	97.0339	60.8696	97.6109
	88.6076	75.3623	89.3617
	96.7532	45.0311	84.6774
	88.8	58.7912	85.2174
	85.2564	60.7595	93.3333
	88.4058	79.1209	93.5065
	89.6341	77.6596	83.6539
	89.0173	42.2078	85.8333
	90.5797	79.078	89.4977
	83.8509	72.3809	85.0267
	92.1053	85.4962
	93.254	59.3023
	87.6404
	98.1366
	90.5172
	86.0656
Mean	87.6061	69.3597	86.4129	85.3709
p-value from an unpaired 2 tailed t-test		****: p <0.0001 to wt ♂ X Ppie-1; No-auxin		n.s. to wt ♂ X PPefl-3; No-auxin
