# Supplementary material for: Caenorhabditis elegans PIEZO channel coordinates multiple reproductive tissues to govern ovulation
Source: eLife. 2020 Jun 3;9:e53603. doi: 10.7554/eLife.53603 (PMC7340503; doi:10.7554/eLife.53603)
Supplement: Figure 9—source data 1. [file elife-53603-fig9-data1.xlsx]

## Sheet: Sheet1
Figure 9. A PIEZO1 disease allele causes severe brood size reduction in C. elegans
Panel C: A conserved patient-specific allele pezo-1(R2405P) was generated and causes a severe reduction in brood size				The data were collected by n=3 independent experiments
Genotype	wt (0-36 hrs)	pezo-1(R2405P) (0-36 hrs)	wt (36-60 hrs)	pezo-1(R2405P) (36-60 hrs)
Temp. (ºC)	20ºC	20ºC	20ºC	20ºC
	Brood Size	Brood Size	Brood Size	Brood Size
	96	57	107	11
	110	48	121	22
	112	67	120	1
	121	57	130	20
	84	53	98	23
	103	60	143	0
	87	62	141	0
	68	66	84	14
	74	24	129	0
	105	6	133	0
	93	20	85	0
	95	7	133	0
	88	27	123	0
	96	27	122	0
	93	29	132	0
	131	63	117	10
	118	69	134	24
	121	70	135	17
	127	78	123	25
	81	59	127	45
	62	59	101	37
	86	76	123	20
	93		108
	88		95
	101		113
	110		129
	107		135
	92		120
	96		122
	68		106
	92		158
	129		116
	86		196
	98		132
	101		144
	92		153
	116		133
	90		143
	117		138
	120		127
	115		80
	109		153
	97		140
	127		94
	91		130
	67		90
	86		124
	105		154
Mean	98.8333	49.2727	124.875	12.2273
p-value from an unpaired 2 tailed t-test		****: p= <0.0001 to wt (0-36 hrs)		****: p= <0.0001 to wt (36-60 hrs)
Panel D: itr-1 (RNAi) enhanced the brood size reduction of pezo-1 (R2405P) mutants, while lfe-2 (RNAi) slightly rescued the reduced brood size.				The data were collected by n=3 independent experiments
Genotype	wt (0-60 hrs) control (smd-1) RNAi	wt (0-60 hrs) itr-1 RNAi	wt (0-60 hrs) lef-2 RNAi	pezo-1(R2405P) (0-60 hrs) control (smd-1) RNAi	pezo-1(R2405P) (0-60 hrs) itr-1 RNAi	pezo-1(R2405P) (0-60 hrs) lef-2 RNAi
Temp. (ºC)	20ºC	20ºC	20ºC	20ºC	20ºC	20ºC
	224	228	228	87	66	93
	225	284	230	78	93	126
	263	248	220	112	118	112
	251	246	244	100	48	45
	242	254	223	70	49	105
	272	314	311	161	118	135
	297	251	278	121	71	173
	358	274	280	94	39	163
	299	305	253	79	78	183
	257	257	308	89	57	108
	350	284	332	91	61	116
	315	272	357	96		172
	296			88
	264			126
	282			126
	353			70
				135
Mean	284.25	268.083	272	101.353	72.5455	127.583
p-value from an unpaired 2 tailed t-test		n.s. to wt (0-60 hrs) control (smd-1) RNAi	n.s. to wt (0-60 hrs) control (smd-1) RNAi		**: p= 0.0079 to pezo-1(R2405P) (0-60 hrs) control (smd-1) RNAi	*: p= 0.0393 to pezo-1(R2405P) (0-60 hrs) control (smd-1) RNAi
